# Supplementary material
Source: Springer Nature journal article supplement (https://www.springermedizin.de/resource/supplementary/12889_2013_6557_MOESM2_ESM.pdf/9498496)

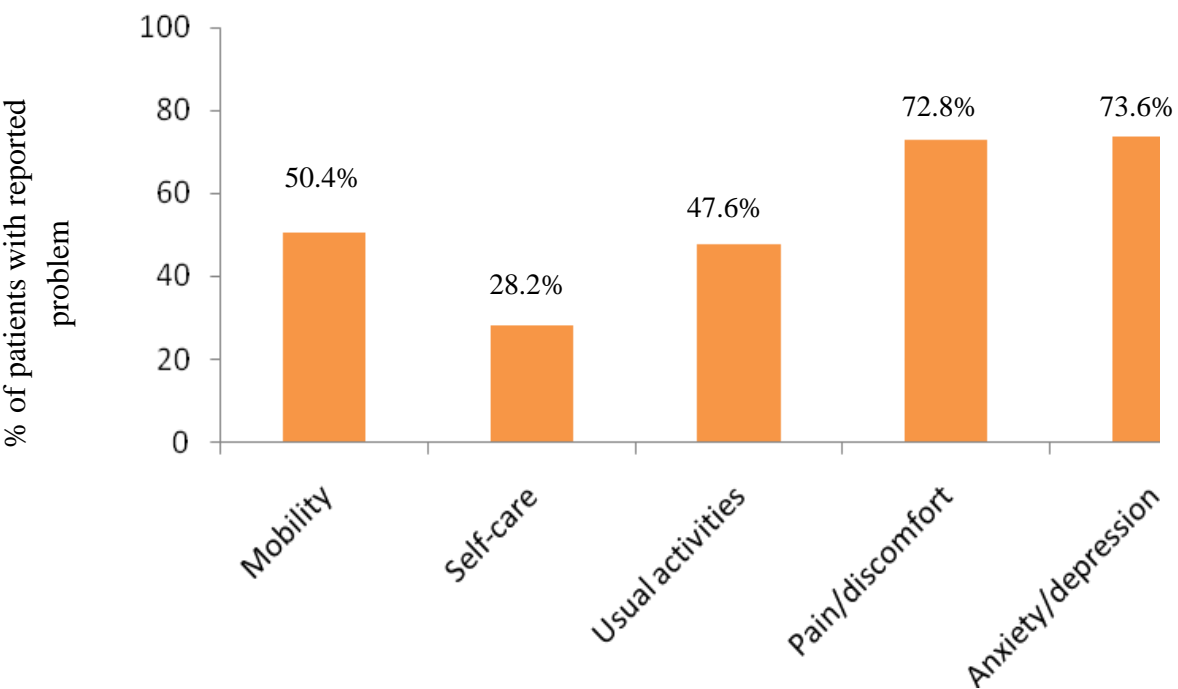

Five domains of the health related QoL (HR-QoL)

Supplement: MOESM2 [file 9498496]
